# Supplementary material
Source: PubMed Central journal article supplement (PMC8110806)
Supplement: 41431_2020_806_MOESM1_ESM.pdf [file 41431_2020_806_MOESM1_ESM.pdf]

### Supplementary Information:

Supplementary Figure 1: Additional survival analyses

Supplementary Figure 1A: Kaplan-Meier survival curve and results from Log Rank (Mantel-Cox) test for patients with *PKD1* truncating, *PKD1* non-truncating, *PKD2* variants as well as patients where no disease-causing mutation was detected.

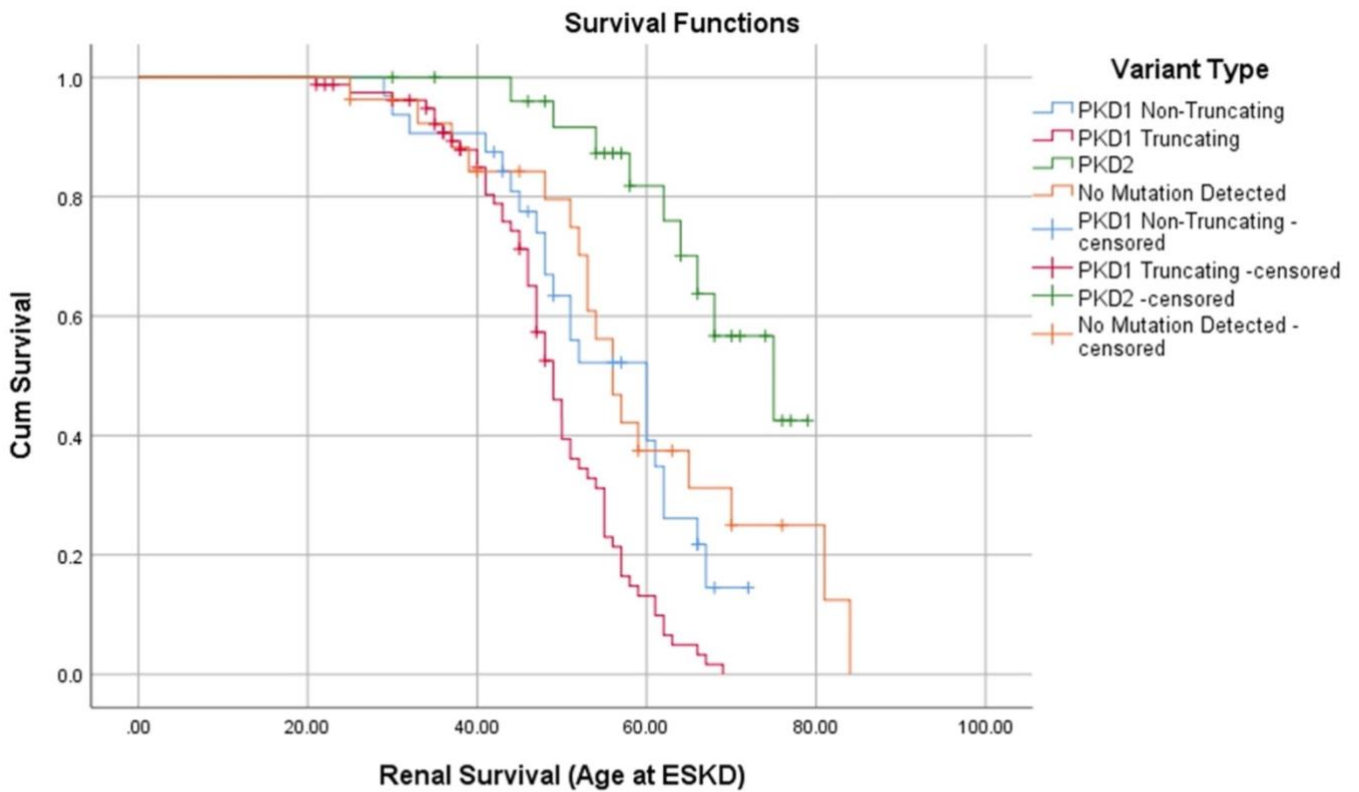

#### Pairwise Comparisons

| Variant_Type          | PKD1 Non-Truncating |       | PKD1 Truncating |           | PKD2       |           | No Mutation Detected |        |
|-----------------------|---------------------|-------|-----------------|-----------|------------|-----------|----------------------|--------|
|                       | Chi-Square          | Sig.  | Chi-Square      | Sig.      | Chi-Square | Sig.      | Chi-Square           | Sig.   |
| Log Rank (Mantel-Cox) |                     |       |                 |           |            |           |                      |        |
| PKD1 Non-Truncating   |                     |       | 9.187           | 0.002     | 11.660     | 0.001     | 0.371                | 0.542  |
| PKD1 Truncating       | 9.187               | 0.002 |                 |           | 41.020     | 1.507E-10 | 12.353               | 0.0004 |
| PKD2                  | 11.660              | 0.001 | 41.020          | 1.507E-10 |            |           | 5.777                | 0.016  |
| No Mutation Detected  | 0.371               | 0.542 | 12.353          | 0.0004    | 5.777      | 0.016     |                      |        |

**Supplementary Figure 1B:** Kaplan-Meier survival curve and results from Log Rank (Mantel-Cox) test for patients with *PKD1* truncating, *PKD1* missense, *PKD1* splicing, *PKD1* stopgain, *PKD2* truncating and *PKD2* non-truncating variants.

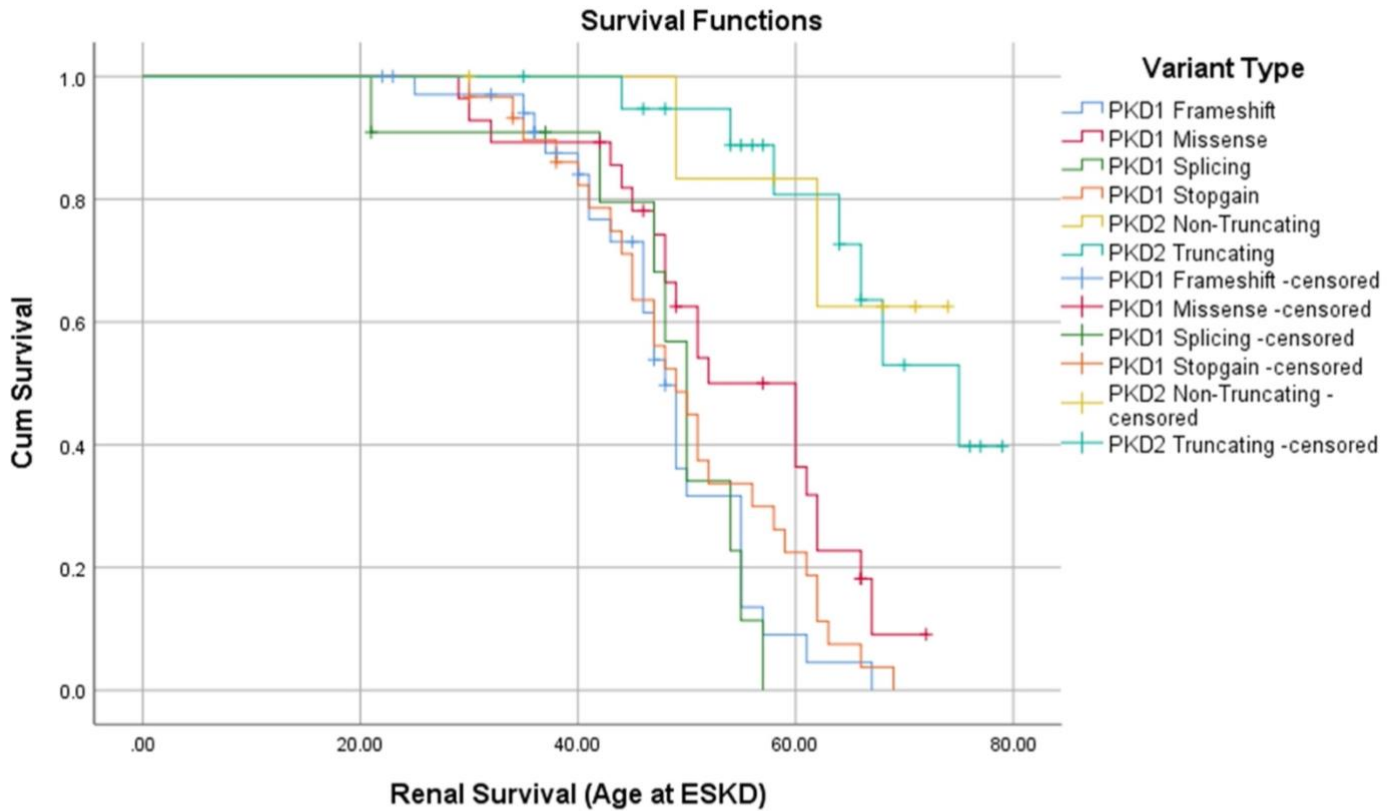

| Variant               | Pairwise Comparisons       |        |                          |        |                          |        |                          |        |                                |        |                            |           |
|-----------------------|----------------------------|--------|--------------------------|--------|--------------------------|--------|--------------------------|--------|--------------------------------|--------|----------------------------|-----------|
|                       | PKD1 Frameshift Chi-Square | Sig.   | PKD1 Missense Chi-Square | Sig.   | PKD1 Splicing Chi-Square | Sig.   | PKD1 Stopgain Chi-Square | Sig.   | PKD2 Non-Truncating Chi-Square | Sig.   | PKD2 Truncating Chi-Square | Sig.      |
| Log Rank (Mantel-Cox) | PKD1 Frameshift            |        | 5.763                    | 0.016  | 0.009                    | 0.925  | 0.751                    | 0.386  | 11.402                         | 0.001  | 26.617                     | 2.481E-07 |
|                       | PKD1 Missense              | 5.763  | 0.016                    | 4.641  | 0.031                    | 3.140  | 0.076                    | 4.689  | 0.030                          | 10.962 | 0.001                      |           |
|                       | PKD1 Splicing              | 0.009  | 0.925                    | 4.641  | 0.031                    | 0.884  | 0.347                    | 8.985  | 0.003                          | 23.584 | 1.196E-06                  |           |
|                       | PKD1 Stopgain              | 0.751  | 0.386                    | 3.140  | 0.076                    | 0.884  | 0.347                    | 9.504  | 0.002                          | 23.909 | 1.010E-06                  |           |
|                       | PKD2 Non-Truncating        | 11.402 | 0.001                    | 4.689  | 0.030                    | 8.985  | 0.003                    | 9.504  | 0.002                          | 0.022  | 0.882                      |           |
|                       | PKD2 Truncating            | 26.617 | 2.481E-07                | 10.962 | 0.001                    | 23.584 | 1.196E-06                | 23.909 | 1.010E-06                      | 0.022  | 0.882                      |           |

Supplementary Figure 2: Representative kidney imaging

Supplementary Figure 2A: Normal kidney on CT scan

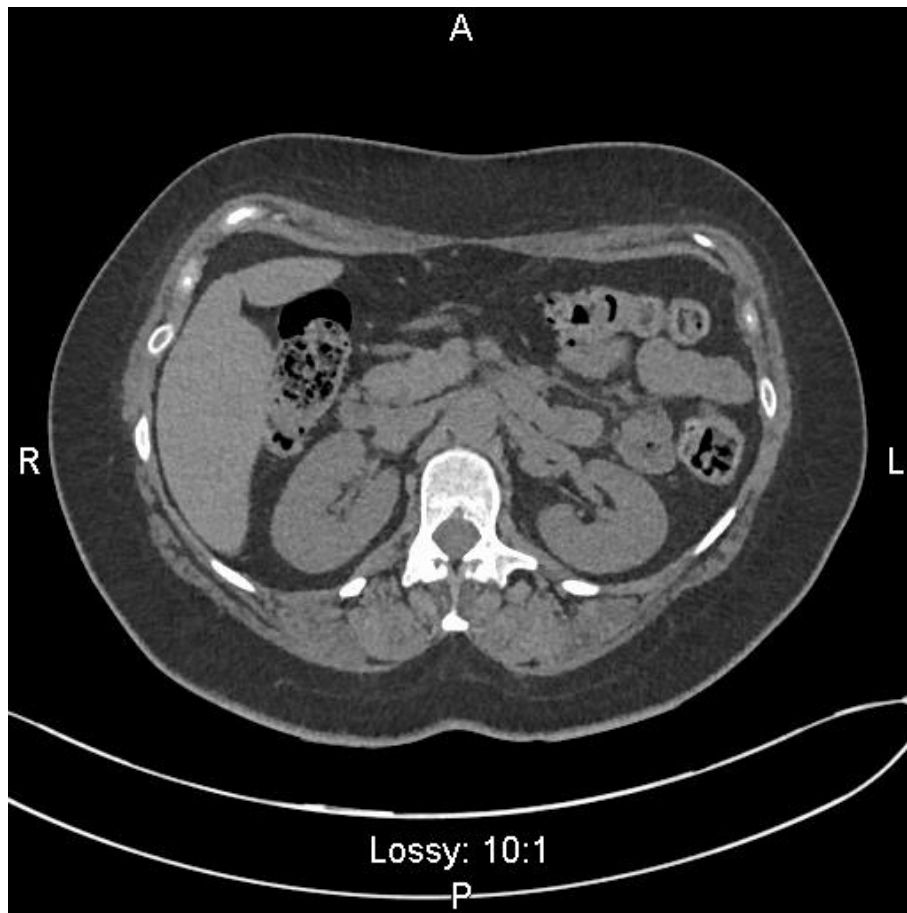

Supplementary Figure 2B: CT scan demonstrating massively enlarged kidneys secondary to truncating *PKD1* stopgain variant in 46-year-old male maintained on haemodialysis (patient 10216).

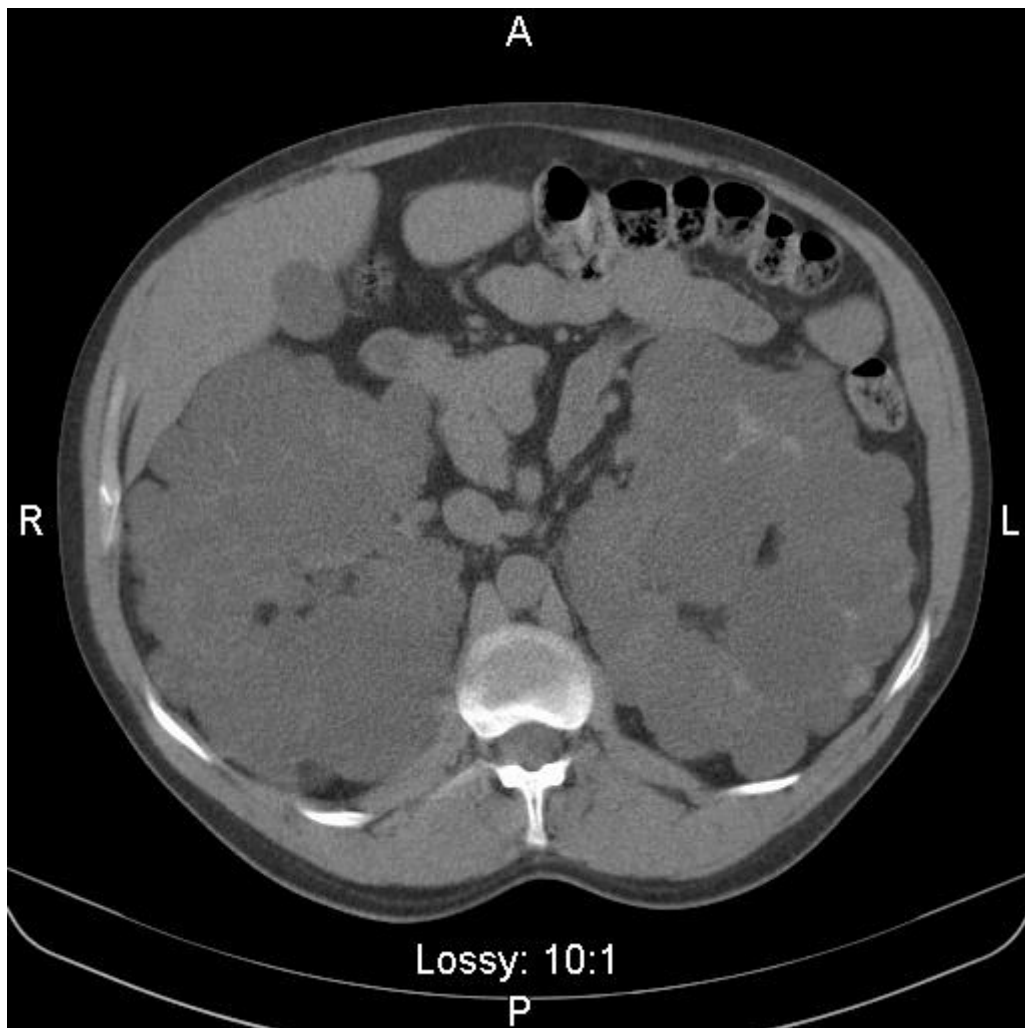

Supplementary Figure 2C: Enlarged kidney secondary to a *PKD2* missense variant in middle aged male with well preserved kidney function (patient 8124).

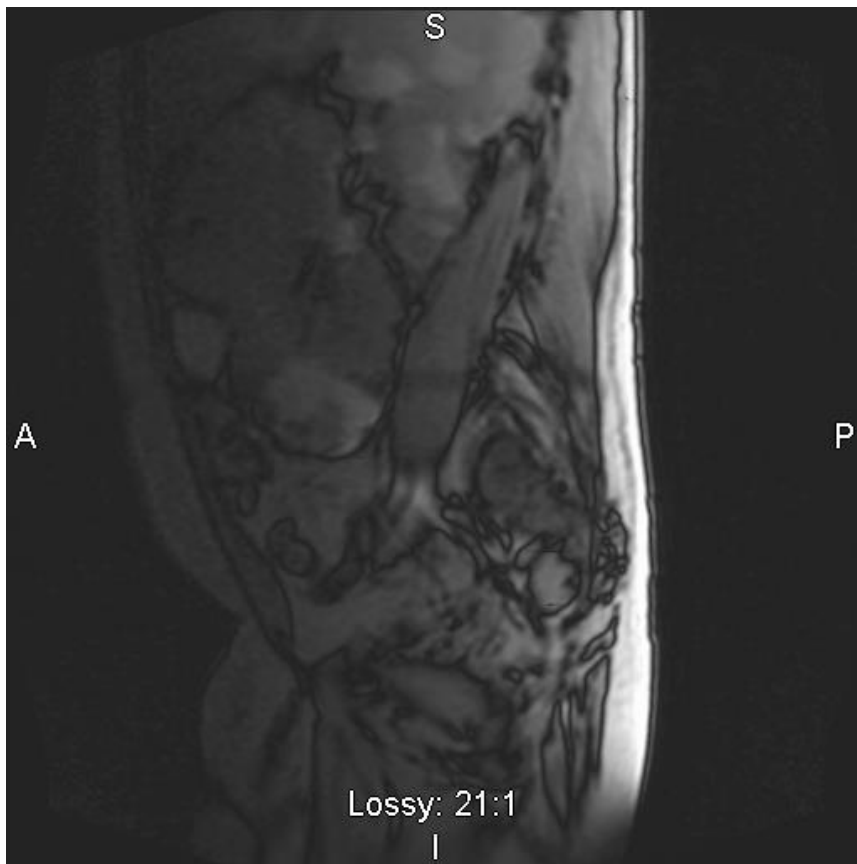

### Supplementary Methods:

**Mayo Clinic Variant Interpretation Guidelines:** Variants were assigned a score in each of the nine categories outlined below. The final cumulative variant score determined the classification of the variant (Sum of the other scores:  $\geq 13$  = Highly Likely Pathogenic, 7 to 12 = Likely Pathogenic, -4 to 6 = Indeterminate,  $\leq -5$  = Likely Neutral)

GV/GD Score: Assessment of the chemical difference of the residue in orthologs (to fish) (Grantham Variation; GV) and between the residue and the substitution (Grantham Difference; GD): Score +8 to -4 (Rossetti 2007)

Domain Score: Assessment of conservation in a domain: Score 0 to +4

Recurrent AA: Residue that is mutated in ADPKD with substitution different than seen here: Score +1 per incidence

Structure Score: Predicted change in secondary structure due to substitution: Score 0 to +2

gnomAD Score: Score depending on occurrence in gnomAD: 0x = +2, 1x = 0, 2x = -2, 3x = -4 etc.

Previous description: Previous description of this variant: Score up to +2 per occurrence

Segregation Score: Score up to +4 depending on extent of segregation demonstrated

Other variant: No other variant of interest in patient = +2, to truncating variant in patient = -5

Splicing: Score for prediction of altered splicing: no evidence for IVS variant = -5 to strongly predicted +5
